1 **Title:** Sex-specific molecular specialization and activity rhythm dependent gene expression  
2 changes in honey bee antennae

3 **Short running title:** Sex-specific molecular specialization of honey bee antennae

4 **Authors:** Rikesh Jain<sup>1,2</sup>, Axel Brockmann<sup>1</sup>

5 <sup>1</sup> National Centre for Biological Sciences, Tata Institute of Fundamental Research,  
6 Bangalore-560056, Karnataka, India

7 <sup>2</sup> SASTRA University, Thirumalaisamudram, Thanjavur-613401, Tamil Nadu, India.

8

9 R.J.

10 Email: rikeshrj@ncbs.res.in; rikeshjain44@gmail.com

11 Phone: +91-80-2366-6504

12 ORCID: 0000-0003-3376-5862

13

14 A.B.

15 Email: axel@ncbs.res.in; axel.ncbs@gmail.com

16 Phone: +91-80-6717-6512, + 91-80-2366-6512

17 Fax: +91-80-2363-6662

18 ORCID: 0000-0003-0201-9656

19

20

21

22 **Keywords**

23 Antennae, antennal transcriptome, sexual dimorphism, mating behavior, foraging, circadian  
24 clock

25

26

27

28

29

30

31

32 **ABSTRACT**

33 Eusocial insects, like honey bees, which show an elaborate division of labor involving  
34 morphologically and physiologically specialized phenotypes provide a unique toolkit to study  
35 molecular underpinnings of behavior as well as neural processing. In this study, we  
36 performed an extensive RNA-seq based comparison of gene expression levels in the antennae  
37 of honey bee drones and foragers collected at different time of days and activity states to  
38 identify molecules involved in peripheral olfactory processing and provide insights into  
39 distinct strategies in sensory processing. First, honey bee drone and worker antennae differ in  
40 the number of olfactory receptor genes (ORs) showing a biased expression pattern. Only 19  
41 Ors were higher expressed in drone antennae, whereas 54 Ors were higher expressed in  
42 workers. Second, drone antennae showed predominant higher expression of genes involved in  
43 energy metabolism, and worker antennae showed a higher expression of genes involved in  
44 neuronal communication. Third, drones and afternoon-trained foragers showed similar daily  
45 changes in the expression of major clock genes, *per* and *cry2*. Most of the other genes  
46 showing changes with the onset of daily activity were specific to drones and foragers  
47 suggesting sex-specific circadian changes in antennae. Drone antennae are specialized to  
48 detect small amounts of queen's pheromone and quickly respond to changes in pheromone  
49 concentration involving energetically costly action potentials, whereas forager antennae are  
50 predominantly involved in behavioral context dependent detection and discrimination of  
51 complex odor mixtures which requires mechanisms of sensory filtering and neural plasticity.

52

53

54

55

56

57

58

59

60

61

62

63

64

65

## 66 INTRODUCTION

67 In honey bees, males (drones) and females (workers and queens) exhibit a strong sexual  
68 dimorphism in the peripheral olfactory sensory system. Drone antennae have about seven  
69 times more olfactory poreplate sensilla and are specialized to detect even minute amounts of  
70 the queen's sex-pheromone (Brockmann et al., 1998; Brockmann et al., 2006; Esslen and  
71 Kaissling, 1976; Wanner et al., 2007). In contrast, workers have a more generalized olfactory  
72 system with different, maybe broader, odorant response profile. For example, worker  
73 antennae house hair-like sensilla (*S. basiconicum*) that are absent on drone antennae, and  
74 worker antennal lobes exhibit about 170 isomorphic olfactory glomeruli, whereas drones  
75 have only 100 normal-sized and 4 macro glomeruli (Arnold et al., 1985; Brockmann and  
76 Brückner, 2001; Esslen and Kaissling, 1976; Flanagan and Mercer, 1989; Galizia et al., 1999;  
77 Kropf et al., 2014; Sandoz, 2006). These differences in the olfactory sensory systems  
78 correlate with the different behavioral functions. Drones have to find and mate with one  
79 queen at the same time outcompeting other drones (Brockmann et al., 2006; Gary, 1962;  
80 Koeniger et al., 2005; Ruttner, 1985). In contrast, workers do all the tasks needed to maintain  
81 the colony and organize the underlying division of labor; and as foragers, they have to learn  
82 and memorize odor mixtures that indicate different rewarding flowers (Frisch, 1967; Frisch  
83 and Aschoff, 1987). These different behavioral contexts suggest that the drone and worker  
84 antennal sensory systems may exhibit different sensory processing strategies and molecular  
85 adaptations (Burger et al., 2013; Grabe and Sachse, 2018). Wanner et al., (2007) already  
86 reported differences in the expression of olfactory receptor genes (*Or*) between drones and  
87 workers and showed that one of the male-biased expressed *Ors* (*Or11*) binds 9-ODA, the  
88 major sex-pheromone compound.

89 In this RNA-seq study, we first compared the antennal transcriptomes of drones and foragers,  
90 to identify gene expression that might reflect differences between a specialist and a generalist  
91 peripheral olfactory system involving innate and learned sensory processing (Amin and Lin,  
92 2019; De Bruyne and Baker, 2008; Renou, 2014). In a second set of experiments we  
93 compared daily changes in antennal gene expression between drones, that only leave the hive  
94 for mating flights in the early afternoon, and foragers that were either entrained to visit a  
95 feeder in the morning or in the afternoon. This comparison allows to explore to which extent  
96 drone and worker antennae show similar or different daily changes in gene expression. One  
97 hypothesis would be that the daily gene expression changes might correlate with the  
98 molecular specialization of the two types of antennae. Finally, we expect to identify genes

99 that are not directly involved in odorant detection, but likely play an important role in  
100 peripheral olfactory processing in insect antennae. Furthermore, these genes might indicate  
101 differences in the sensory processing in drone and worker antennae.

102

## 103 **MATERIALS AND METHODS**

### 104 **Animals**

105 In all experiments we used *Apis mellifera* colonies of naturally mated queens which consisted  
106 of about 8000 workers (i.e. 8 frames with approximately 1000 workers) and hundreds of  
107 drones. Colonies were acquired from a local beekeeper and maintained on the campus of the  
108 National Centre for Biological Sciences (NCBS), Bangalore, India.

### 109 **Daily drone flight activity**

110 Daily drone flight activity was determined for three colonies on three different days during a  
111 period of two weeks (Oct 28, Nov 03 and Nov 10, 2017). On the experimental days numbers  
112 of drones leaving the hive entrance were counted every half an hour for 10 minutes from 7:00  
113 to 19:00 hours (h). During this time of the year, sunset is at around 18:00 h in Bangalore. On  
114 these days, we also recorded temperature and humidity changes every minute using a data  
115 logger (EQ-172, Equinox, Valli Aqua And Process Instruments, Chennai, India).

### 116 **Collection of drones for antennal RNA-seq and qPCR**

117 During daily mating flight activity, drones were caught at the hive entrance and color marked  
118 on the thorax. On the next day color-marked drones were collected at two different time  
119 points: 9:00 (inactive) and 14:00 h (active/mating flight time, also see Naeger and Robinson,  
120 2016) from 3 different colonies (5 bees per time point per colony). At 9:00 h drones were  
121 collected from inside the colonies and at 14:00 h they were collected from the entrance before  
122 they started the mating flights. In a separate experiment we collected color-marked drones  
123 from one of the three colonies at 6 different time points: 6:00, 10:00, 14:00, 18:00, 22:00 and  
124 2:00 (10 bees per time point) to determine daily expression changes of four major clock  
125 genes i.e. *period* (*per*), *cryptochrome2* (*cry2*), *cycle* (*cyc*) and *clock* (*clk*). Night collections  
126 were done using dim red light. All collected drones were immediately flash frozen in liquid  
127 nitrogen.

### 128 **Collection of time-trained foragers for antennal RNA-seq**

129 An *A. mellifera* colony was transferred in an enclosed outdoor flight cage to entrain the  
130 foraging activity of the workers to a distinct time of the day. First, the colony was allowed to

131 adjust to the new environment for 10 days. During this period the sugar and pollen feeders  
132 were presented for the whole day. The sugar feeder was a yellow plastic plate surrounded  
133 with 4 filter papers containing a 5 $\mu$ l drop of 100 times diluted linalool racemic mixture  
134 (Sigma-Aldrich, St. Louis, Missouri). Then, for the time-training, the sucrose reward (1M  
135 sucrose solution) was presented either from 8:00 to 10:00 h (morning training) or from 13:00  
136 to 15:00 h (afternoon training) for 10 consecutive days. Time for the afternoon training was  
137 chosen according to the drone flight time. Two different colonies were used for morning and  
138 afternoon training. Every day after the training time the feeder was cleaned with ethanol and  
139 linalool scented filter papers were replaced with fresh unscented filter papers. This cleaned  
140 empty feeder was available for the remaining time of the day. On the 8<sup>th</sup>, 9<sup>th</sup> and 10<sup>th</sup> day of  
141 training, foragers visiting the feeder were marked on their thorax with different colors, one  
142 type of color each day, to identify the frequently visiting foragers. On the 11th day, the feeder  
143 was not presented and the foragers that had all 3 color marks were collected at 9:00 and 14:00  
144 h from both the colonies (10 bees per time point per colony). Collected foragers were  
145 immediately flash frozen in liquid nitrogen.

#### 146 **RNA isolation from the antennae**

147 Collected honey bee samples were transferred from liquid nitrogen onto dry ice and the entire  
148 antennae (i.e. scape, pedicel and flagellum) were cut off. We pooled 10 antennae from 5 bees  
149 for RNA-seq samples and 4 antennae of 2 bees for qPCR samples. Total RNA was isolated  
150 using Trizol® method (Invitrogen, Carlsbad, CA). Samples were treated with DNaseI  
151 (Invitrogen, Carlsbad, CA) for 10 minutes to remove any possible DNA contamination. Final  
152 RNA concentration was measured using nanodrop and quality was confirmed by running an  
153 agarose gel.

#### 154 **qPCR**

155 0.5 $\mu$ g-1 $\mu$ g of total RNA was converted into cDNA using Superscript III and oligo d(T)16  
156 primers (Invitrogen, Carlsbad, CA). QPCR was performed using KAPA SYBR FAST qPCR  
157 Master Mix (Kapa Biosystems, Wilmington, MA) in 7900HT Fast Real-Time PCR system  
158 (Applied Biosystems, Carlsbad, CA). Triplicate reactions (10 $\mu$ l reaction mix) for all the  
159 biological replicates of all 6 time points samples (n=5 per time point) were run in parallel on  
160 the same 384-well plate. This restricted us to analyze just one of the clock genes (S1 Table)  
161 and *ribosomal protein49 (rp49)* (an internal control gene) (Jain and Brockmann, 2018) per  
162 plate. We also ran standard curve for both primers on the same plate using a separate stock

163 cDNA. Final gene expression calculation was based on the linear values interpolated from the  
164 standard curves. Efficiency of all the primers were between 95-100%. QPCR reactions with  
165 bad dissociation curve were discarded from the analysis.

#### 166 **RNA-seq**

167 Antennal transcriptomes of drones (n=3 per time point), morning-trained foragers (n=2 per  
168 time point) and afternoon-trained foragers (n=2 per time point) were sequenced at 2 different  
169 time points (9:00 h and 14:00 h). Total RNA was shipped on dry ice to AgriGenome Labs  
170 (Kochi, India). RNA quality was further checked on Agilent Tapestation and Qubit. Libraries  
171 were prepared using TruseqRibozero gold + Truseq mRNA stranded library prep Kit.  
172 Sequencing was performed on an Illumina NextSeq500 platform and around 120 millions of  
173 75-bp-long paired-end reads were generated.

#### 174 **Data analysis**

175 **qPCR:** We used cosinor package (Mutak, 2017) in R (R Core Team, 2017) to fit a 24 hour  
176 cosine model  $\{y = \text{intercept} + \text{amplitude} * \cos(2*\pi(x - \text{acrophase})/24)\}$  (Nagari et al., 2017)  
177 in the circadian genes expression data. We performed a non-parametric JTK cycle analysis  
178 (Hughes et al., 2010; Patton et al., 2014) to detect daily rhythmicity in clock genes expression  
179 and Kruskal-Wallis test to show the differences in mRNA levels with time of the day (Table  
180 1).

181 **RNA-seq:** Approximately 7-10 million pairs of 75-bp-long reads per sample were mapped to  
182 *Apis mellifera* genomeHAV3.1 (Wallberg et al., 2019) using STAR (Dobin et al., 2013). The  
183 alignment rate was more than 75% (75.15% to 86.82%) for all the samples. The number of  
184 reads aligning to each gene were counted using featureCounts (Liao et al., 2014). The  
185 differentially expressed genes (DEGs) with p-adj. less than 0.05 (Wald test) were identified  
186 using DESeq2 (Love et al., 2014). Pathview package (Luo and Brouwer, 2013) in R was used  
187 to integrate the DEGs data to relevant pathway graphs from KEGG and to visualize. In  
188 addition, GAGE package (Luo et al., 2009) in R was used for geneset enrichment analysis  
189 (GSEA) using normalized count data from featureCounts and the KEGG pathway database  
190 (Kanehisa and Goto, 2000). Gene Ontology (GO) enrichment analysis was done using  
191 g:Profiler (Raudvere et al., 2019) keeping alpha of 0.05 as cut off for significance.

192

193 **RESULTS**

194 **1. Drones and worker antennae show sex-specific molecular specialization indicating**  
 195 **different sensory processing strategies**

196 Drone and worker antennae showed distinct and prominent transcriptomic profiles. The 14  
 197 RNA-seq samples separated in 2 clear sex-specific clusters (Fig 1), and we could identify  
 198 3998 differentially expressed genes (DEGs) ( $p_{adj} < 0.05$ ) between drones and foragers (S1  
 199 Table). Out of these 3998 genes 1815 were higher expressed in drones and 2183 were higher  
 200 expressed in foragers (Fig 1).

201

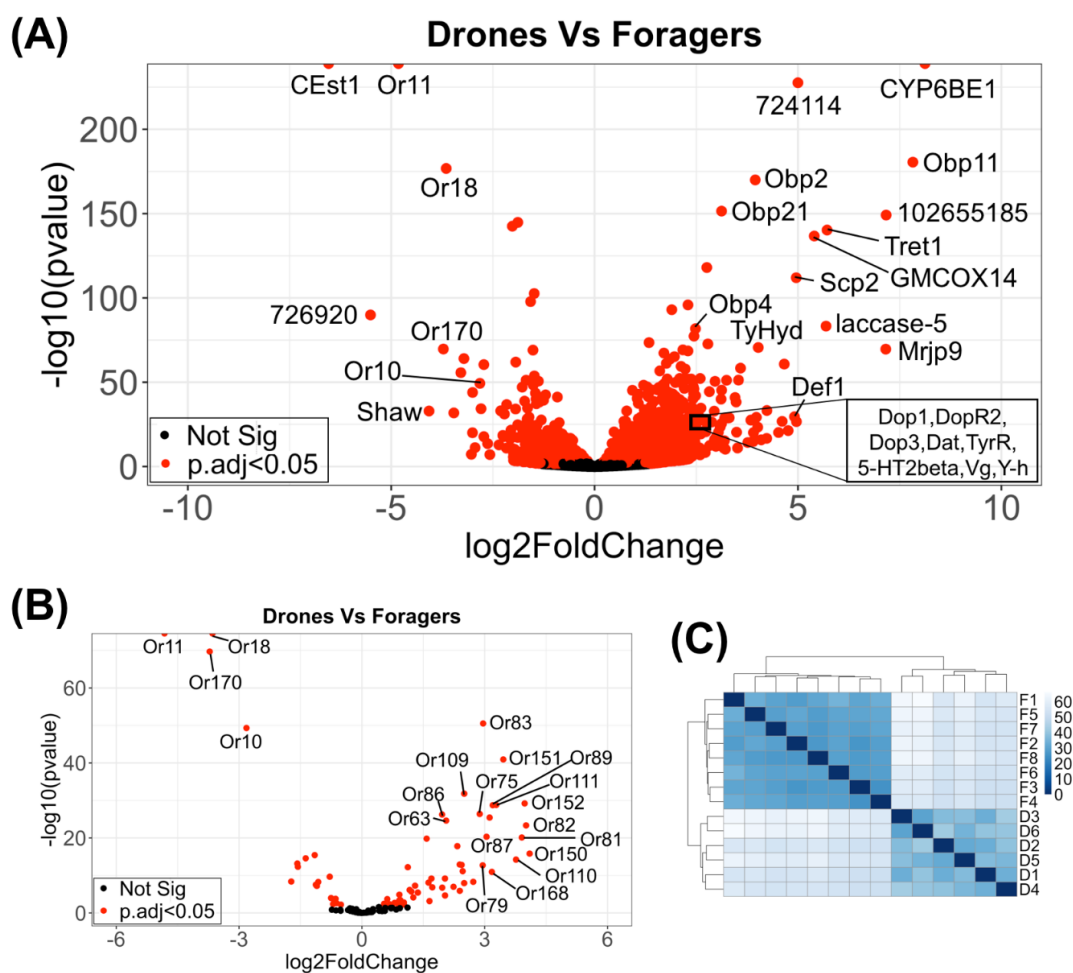

202

203 **Fig 1. Sexual differences in antennal transcriptome.** (A) Differential expression (DESeq2)  
 204 of all the genes across drone versus forager antennae. (B) Differential expression (DESeq2)  
 205 of odorant receptors (Ors) genes across drone versus forager antennae. (C) Sample distance  
 206 heatmap based on variance stabilized RNA-seq read-count from DESeq2. Drone samples D1,  
 207 D2 and D3 are collected in the morning and D4, D5 and D6 are collected in the afternoon.  
 208 Similarly, forager samples F1, F2, F3 and F4 are collected in the morning and F5, F6, F7 and  
 209 F8 are collected in the afternoon. Forager F1, F2, F5 and F6 are the afternoon-trained  
 210 foragers and remaining are morning-trained foragers.

211

212 Remarkably, among the DEGs with the highest expression differences in our study were  
213 almost all the genes that previously were reported to be differently expressed: *Or10*, *Or11*  
214 (the 9-ODA olfactory receptor), *Or18*, *Or170* and *carboxyl esterase1 (CEst1)* were higher  
215 expressed in drone antennae (Wanner et al., 2007); and *Or63*, *Or81*, *Or109*, *Or150*, *Or151*,  
216 *Or152*, *Obp2*, *Obp4*, *Obp11*, *Obp16*, *Obp19*, *Obp21*, *CSP6* and *Cyp6BE1* were higher  
217 expressed in worker antennae (Fig 1A and S1 Table) (Forêt and Maleszka, 2006; Wanner et  
218 al., 2007). However, in contrast to these studies, our RNA-seq analysis identified total 73 Ors  
219 genes showing significant expression differences ( $p.adj < 0.05$ ) between drone and forager  
220 antenna, whereof 19 (12 with  $\log_2$ fold change  $> 1$ ) were higher expressed in drones and 54 (40  
221 with  $\log_2$ fold change  $> 1$ ) higher in foragers (Fig 1B and S2 Table). In addition to the  
222 olfactory receptor genes we found a higher expression of *Obp1*, *ionotropic receptor 21a* and  
223 *the gustatory receptor for sugar taste 43a (=Amgr3)* in drone antennae, and higher expression  
224 of the, *Obp12*, and *CSP3* in forager antennae.

225 Besides the genes that are obviously involved in olfaction we found a number of significantly  
226 different genes ( $\log_2$ fold change  $> 1$ ,  $p.adj < 0.05$ ) that either could be involved in olfactory  
227 sensory processing or other important function of the antennae (Table S1). Drone antennae  
228 showed a higher expression of the two major sex-determining genes, *complementary sex*  
229 *determiner (csd)* and *feminizer (fem)*, the voltage-gated potassium channel (*Shaw = Shaker*  
230 *cognate w*), *nitric oxide synthase (NOS)*, and *glutathione S-transferase (GstD1, GstS4)* the  
231 latter three likely playing a role in odorant detection, olfactory transduction and cellular  
232 signaling.

233 Most interestingly, forager antennae showed a higher expression of several biogenic amine  
234 receptors: *Dop1*, *Dop3*, *DopR2* (dopamine receptors), *5-HT2alpha*, *5-HT2beta* (serotonin  
235 receptors), *TyrR* (tyramine receptor), several glutamate receptors (*ionotropic glutamate*  
236 *receptor*, *glutamate receptor 1* and *vesicular glutamate transporter 1*), enzymes of the  
237 tyrosine/dopamine biosynthesis pathway (*tyrosine hydroxylase* and *tyrosine*  
238 *aminotransferase*), as well as several genes involved in neuropeptide signaling (*adipokinetic*  
239 *hormone receptor*, *tachykinin*, *prohormone-2* and *neprilysin-4*). Further, the TRPV channel  
240 *nanchung* showed a higher expression in forager antennae. *Nanchung* was reported to be  
241 expressed in the Johnston's organ and involved in hearing and gravity perception (Sun et al.,  
242 2009). Mondet et al (2015) previously showed a higher expression of *nanchung* in forager  
243 antennae compared to nurse antennae. Finally, *vitellogenin (Vg)*, several genes of the *major*



244 *royal jelly proteins* and *the yellow proteins*, all likely be involved in sex- and caste-specific  
245 behaviors (*Mrjp1*, *Mrjp3*, *Mrjp8*, *Mrjp9*, *Y-h*, *Y-y*, *Y-e3*, *Y-f*) as well as the immune genes  
246 *defensin* (*Def1*, *Def2*), *abaecin*, *apidaecin1* (*Apid1*), and *transferrin1* (*Tsf1*) were higher  
247 expressed in worker antennae.

248 Gene set enrichment analysis using KEGG pathway database revealed significant (q-  
249 value<0.1) upregulation of 65 biological pathways in drone and 4 biological pathways in  
250 forager antennae (S3 Table). Two of the most significant pathways (lowest q-values) in drone  
251 antennae were oxidative phosphorylation (ame00190) (Fig2A) and protein processing in  
252 endoplasmic reticulum (ame04141) (Fig 2B). In contrast, in worker antennae, ligand-receptor  
253 interaction (ame04080) (Fig 3A) and tyrosine metabolism (ame00350) (Fig 3B) were the  
254 most significant.

255 Gene Ontology (GO) enrichment analysis using DEGs with more than 2 fold expression  
256 differences (471 DEGs in drones and 914 in foragers) showed significant enrichment of 53  
257 and 105 GO terms in drones and foragers respectively ( $p<0.05$ ; S4 Table). Significantly  
258 enriched GO terms in drones include catalytic activity (GO:0003824), odorant binding  
259 (GO:0005549), metabolic process (GO:0008152), protein folding (GO:0006457),  
260 cytoplasmic part (GO:0044444) and mitochondria (GO:0005739). In foragers, some of the  
261 significantly enriched GO categories were signaling receptor activity (GO:0038023),  
262 molecular transducer activity (GO:0060089), regulation of cellular process (GO:0050794),  
263 signaling (GO:0023052), sensory perception (GO:0007600), integral component of  
264 membrane (GO:0016021) and extracellular region (GO:0005576).

265

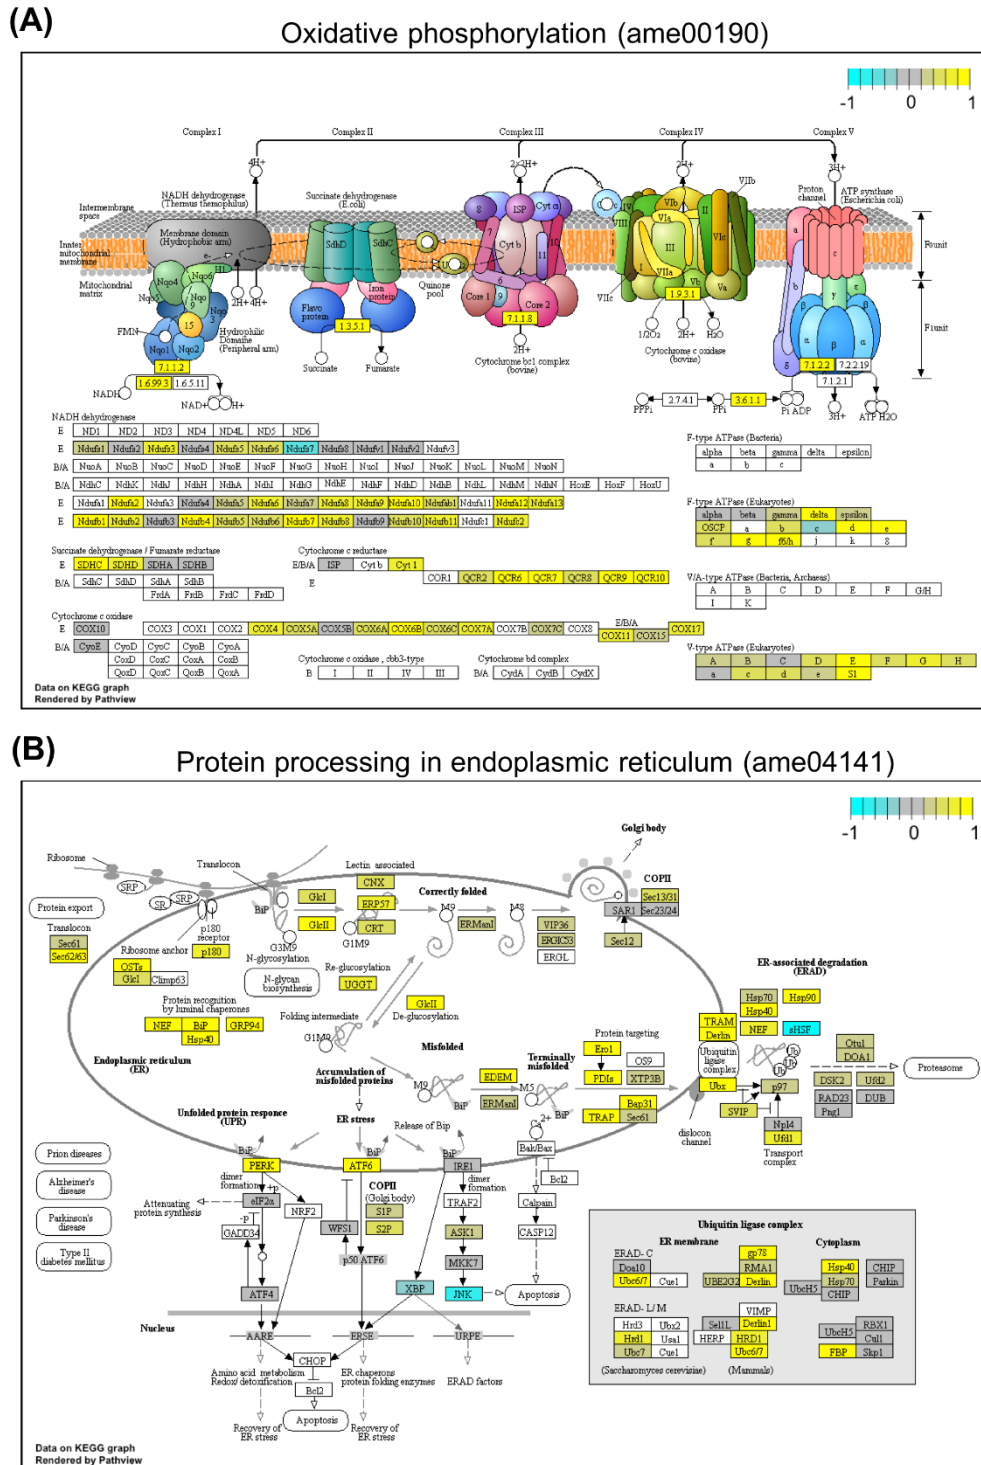

266

267 **Fig 2. Top two significantly enriched KEGG pathways in drone antennae.** Gene set  
 268 enrichment analysis was performed using gage package and gene expression data was  
 269 integrated to relevant KEGG pathways using pathview package in R. Yellow (positive  
 270 values) highlighted genes are higher expressed in drones, cyan (negative values) highlighted  
 271 genes are lower expressed in drones or higher expressed in foragers. Genes with gray  
 272 background do not show expression differences between drones and foragers. Genes with  
 273 transparent background are not found or annotated in honey bees.  
 274

(A) Neuroactive ligand-receptor interaction (ame04080)

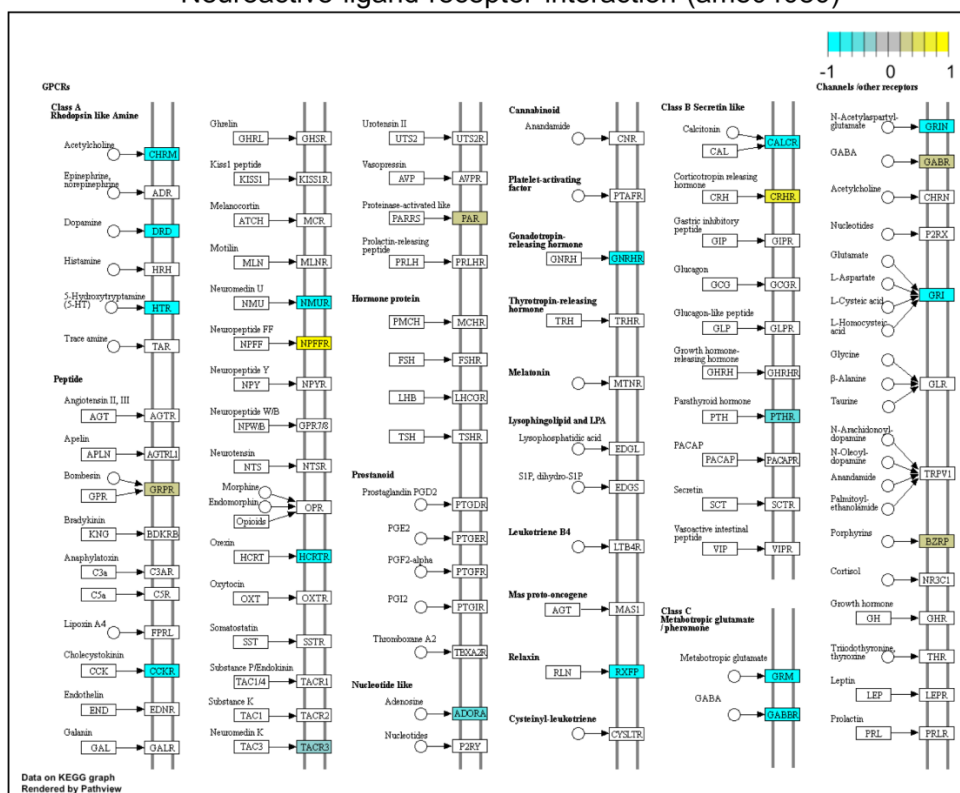

(B) Tyrosine metabolism (ame00350)

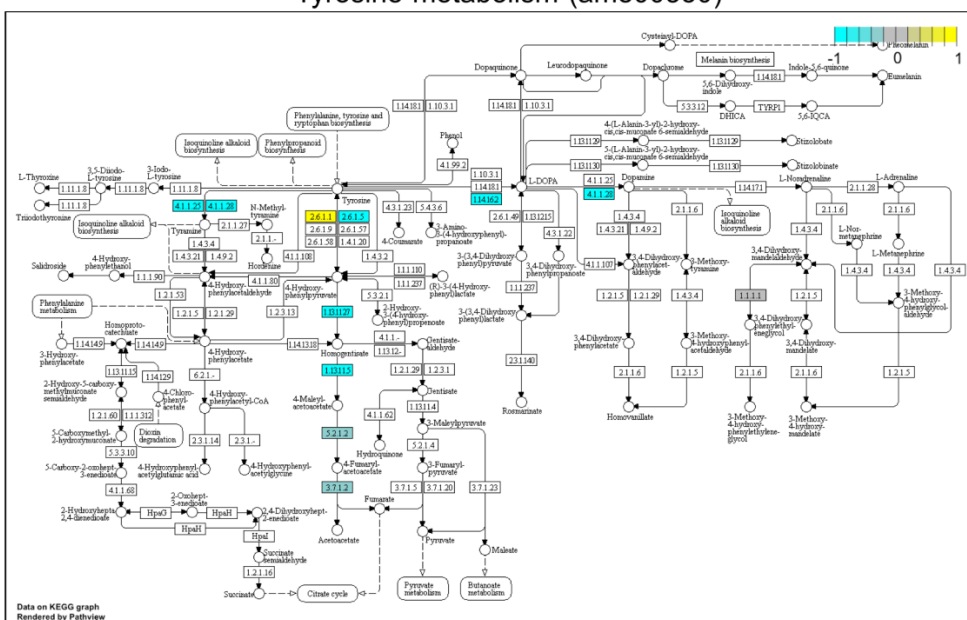

275

276 **Fig 3. Top two significantly enriched KEGG pathways in foragers antennae.** Gene set  
 277 enrichment analysis was performed using gage package and gene expression data was  
 278 integrated to relevant KEGG pathways using pathview package in R. Cyan (negative values)  
 279 highlighted genes are higher expressed in foragers and yellow (positive values) highlighted  
 280 genes are lower expressed in foragers or higher expressed in drones. Genes with gray  
 281 background do not show expression differences between drones and foragers. Genes with  
 282 transparent background are not found or annotated in honey bees.

283

284 **2. Antennae of drones performing afternoon mating flights and antennae of foragers**  
285 **entrained to forage in the afternoon show similar clock gene expression patterns**

286 Drones of three *A. mellifera* colonies maintained at NCBS campus performed mating flights  
287 between 13:00 and 15:00 hours on all three observation days (Fig 4). Flight activity did not  
288 differ among colonies and experimental days. During these two hours the temperature was  
289 about 25°C and the relative humidity was around 60-70%.

290

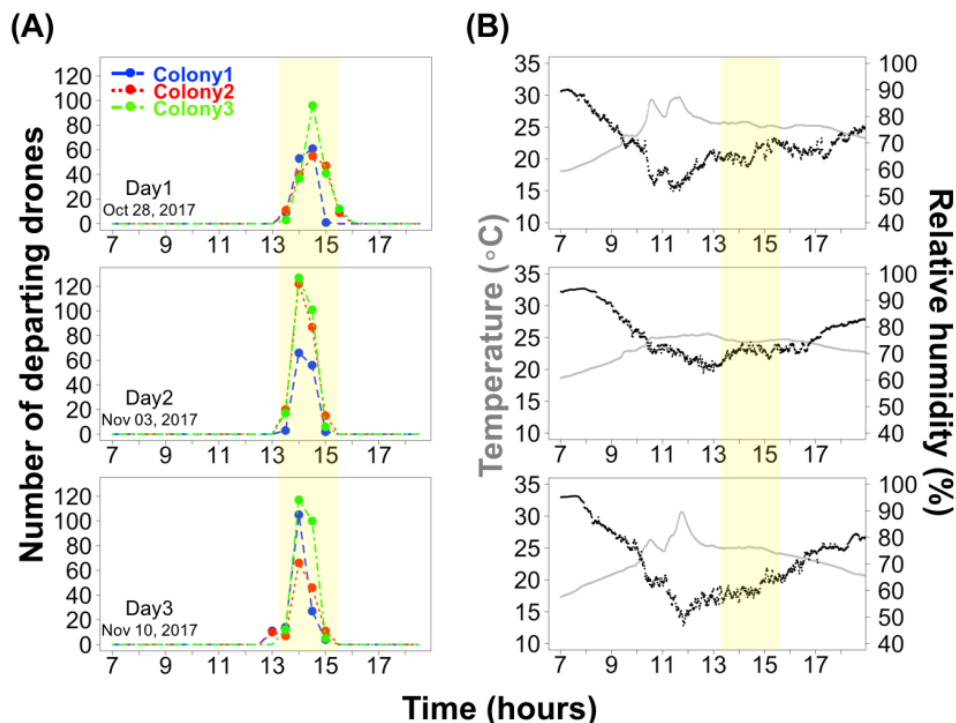

291

292 **Fig 4. Drone flight timing of *A. mellifera* in Bangalore.** (A) Number of departing drones,  
293 counted for the first 10 minutes every half an hour over 3 days from 3 different colonies  
294 (color code). (B) Temperature and humidity was recorded at each minute on all 3 days.

295

296 The antennae of drones performing mating flights showed significant 24-hour daily rhythms  
297 in the mRNA levels of major clock genes (n=5 per time point; Fig 5 and Table 1). *Cry2* and  
298 *per* mRNA levels peaked during early morning, while the *cyc* mRNA level was highest  
299 during the afternoon. *Clk* mRNA levels did not change. *Cry2* oscillated with higher amplitude  
300 than *per* and *cyc*. This expression pattern of clock genes is similar to that of afternoon-trained  
301 foragers (Jain and Brockmann, 2018; Spangler, 1972).

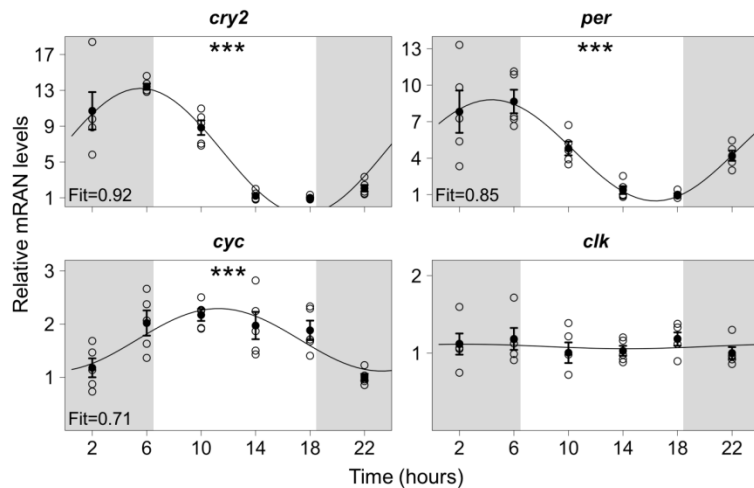

302

303 **Fig 5. Clock genes mRNA rhythm in drone antennae.** Open circles indicate individual  
 304 qPCR measurements from 4 pooled antennae (n=5 per time point), normalized against the  
 305 internal reference gene, *rp49*. Filled circle represents the mean  $\pm$  SEM. Curved lines through  
 306 the data points correspond to the best fitted 24-hour cosine models. Fit values for the cosine  
 307 models are indicated at the bottom left of the plots. Statistical significance of daily mRNA  
 308 rhythms are presented with asterisks (\*\*\*) ( $p < 0.005$ , Kruskal-Wallis test and JTK cycle  
 309 analysis) at the top center of each plot. Gray shades in the background of each plot indicate  
 310 the night time i.e. 18:30 to 6:30.

311

312

313 **Table 1. Non-parametric JTK cycle analysis and Kruskal-Wallis test for qPCR data.**

| Gene Name   | LAG | AMP  | ADJ. P   | p-value<br>(Kruskal-Wallis test) |
|-------------|-----|------|----------|----------------------------------|
| <i>Cry2</i> | 4   | 6.62 | 7.96E-10 | 1.31E-04                         |
| <i>Per</i>  | 4   | 3.19 | 2.02E-08 | 2.71E-04                         |
| <i>Cyc</i>  | 10  | 0.53 | 3.54E-04 | 4.49E-03                         |
| <i>Clk</i>  | 6   | 0.01 | 1        | 0.702                            |

314

315 Column named LAG, AMP and ADJ.P are from JTK cycle analysis (Hughes et al., 2010).  
 316 LAG represents approximate time of the day (in hours) at which the gene expression cycle  
 317 reaches its maximum and AMP stands for amplitude of the gene expression cycle (relative  
 318 mRNA levels in arbitrary units). ADJ.P is for adjusted p-values.

319

320

321

322

323

324

325

### 326 3. Daily activity rhythm affects antennal gene expression in drones and foragers

327 We found 75, 72 and 70 DEGs ( $p_{adj} < 0.05$ ) between morning (9:00 h) and afternoon (14:00  
 328 h) in the antennae of drones, foragers visiting a feeder in the morning (morning-trained  
 329 foragers), and foragers trained to visit a feeder in the afternoon (afternoon-trained foragers),  
 330 respectively (S5 Table).

331

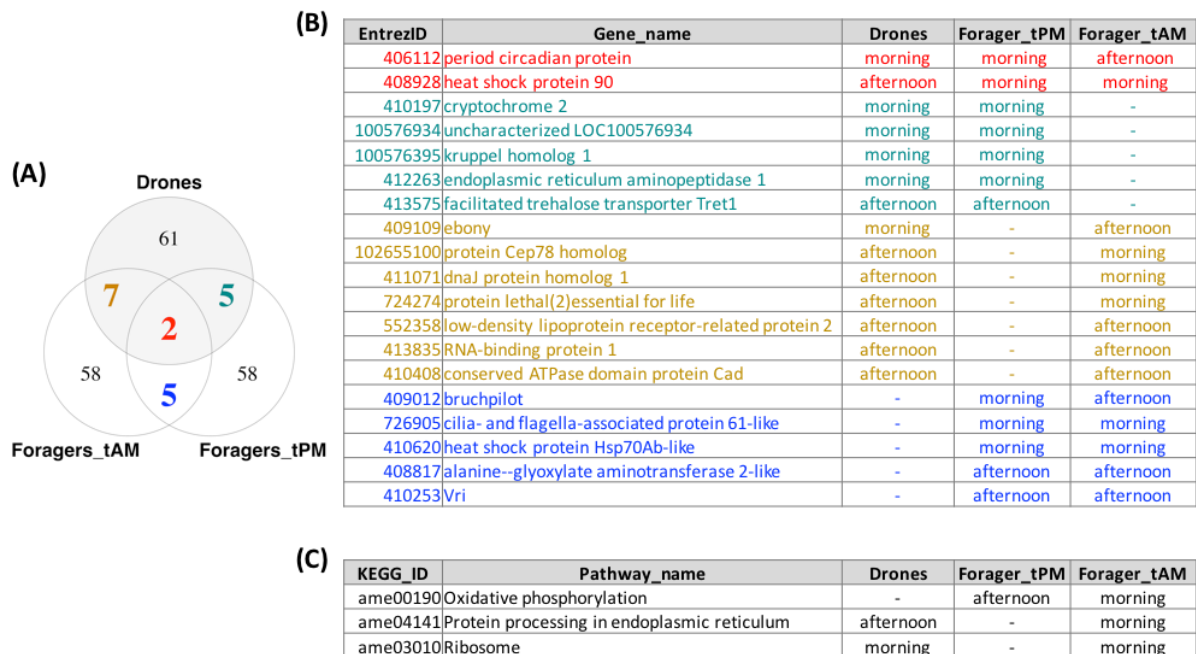

332

333 **Fig 6. Change in antennal gene expression and signaling pathways with activity.** (A)  
 334 Venn diagram representing number of common and unique genes among drones, afternoon-  
 335 trained foragers (Foragers\_tPM) and morning-trained foragers (Foragers\_tAM). (B) All 19  
 336 common color coded genes from Venn diagram are listed along with the time of the day  
 337 when their expression was higher. (C) Significantly enriched genesets ( $q\text{-value} < 0.05$ , GAGE)  
 338 with the time of the day when their average expression was higher.

339

340 Two DEGs, *per* and *heat shock protein 90* (*hsp90*), showed change in expression between  
 341 morning and afternoon in all 3 groups compared (Fig 6A and 6B). Similar to our qPCR  
 342 results, expression of *per* was strongly associated with the daily activity rhythm. In drones  
 343 and afternoon-trained foragers *per* mRNA level was higher in the morning and in morning-  
 344 trained foragers *per* expression was higher in the afternoon. In contrast, the expression  
 345 change of *hsp90* was sex-specific. In drones *hsp90* was higher expressed in the afternoon  
 346 whereas in foragers it was higher expressed in the morning independent of the activity  
 347 rhythm of the forager group.

348 We found 5 DEGs (*cry2*, *LOC100576934*, *kruppel homolog1*, *endoplasmic reticulum*  
349 *aminopeptidase1* and *Tret1*) common between drones and afternoon-trained foragers and all  
350 of them showed expression changes in the same direction (Fig 6A and 6B). Similar to *per*,  
351 expression of *cry2* was higher in the morning in both, drones and afternoon-trained foragers.  
352 This further confirms our finding that drones and foragers that are active in the afternoon  
353 show similar antennal clock gene rhythms. There were 7 DEGs common between drones and  
354 morning-trained foragers out of which 4 (*ebony*, *protein Cep78 homolog*, *dnaJ protein*  
355 *homolog1* and *protein lethal(2)essential for life*) showed changes in opposite direction  
356 suggesting their expression is also associated with the activity rhythm. We also found 5  
357 common DEGs (*bruchpilot*, *cilia- and flagella-associated protein 61-like*, *heat shock protein*  
358 *Hsp70Ab-like*, *alanine--glyoxylate aminotransferase 2-like*, *Vri*) between morning-trained  
359 foragers and afternoon-trained foragers. Similar to *per*, *bruchpilot (brp)* was higher expressed  
360 in the morning in afternoon-trained foragers and higher expressed in the afternoon in  
361 morning-trained foragers indicating that the gene is regulated by the activity state. The  
362 remaining four genes showed changes in the same direction in both groups appear to be  
363 regulated by the time of the day and not the activity state.

364 In addition to the common genes that showed morning and afternoon expression differences  
365 in two or all three experimental groups, we found 61 DEGs that showed changes in the  
366 expression only ( $p.adj < 0.05$ ) in the drone antennae (S5 Table). Among these genes were *jun-*  
367 *related antigen (Jra)*, *Hr38*, *foraging (for)*, *dopa decarboxylase (Ddc)*, *semaphorin-2A*,  
368 *calreticullin (Crc)*, *painless*, *SIFamide receptor (SIFR)*, *prohormone-2* and many *heat shock*  
369 *proteins (hsps)*. In the morning-trained foragers, we found 58 DEGs with expression changes  
370 between morning and afternoon (e.g. *neurexin 1*, *cwo*, *semaphorin-1A*, *neurobeachin*,  
371 *DopEcR* and *SK*) (S5 Table). In the afternoon-trained foragers, there were also 58 DEGs with  
372 expression changes between morning and afternoon (e.g. *octopamine receptor (Oa1)*, *venus*  
373 *kinase receptor (Vkr)*, *Neural-cadherin* and *Glucose dehydrogenase (Gld2)*) (S5 Table).

374 Geneset enrichment analysis revealed significant enrichment ( $q.value < 0.05$ ) of the following  
375 3 important pathways (Fig 6C and S6 Table) - oxidative phosphorylation (ame00190), protein  
376 processing in endoplasmic reticulum (ame04141) and ribosome (ame03010). Oxidative  
377 phosphorylation showed significant enrichment only in the foragers and was strongly  
378 associated with their activity rhythm. In morning-trained foragers, it was upregulated in the  
379 morning; and in afternoon-trained foragers, it was up in the afternoon. Ame04141 was found

380 significantly enriched in drones and morning-trained foragers. It also showed strong  
381 association with the activity state. In drones, it was higher in the afternoon (during their  
382 mating flight time) while in morning-trained foragers, it was higher in the morning (during  
383 their foraging time). Lastly, *ame03010* was higher in the morning in drones as well as in  
384 morning-trained foragers suggesting no association with the activity state but the time of the  
385 day.

386  
387

## 388 **DISCUSSION**

389 In this study, we performed an extensive comparison of gene expression levels between the  
390 antennae of honey bee drones and foragers collected at different activity states, i.e. resting vs  
391 mating flight activity and resting vs foraging flight activity. The principle findings of these  
392 comparisons are: (1.) Drone and worker antennae show sex-specific molecular specialization  
393 corresponding to already known morphological and physiological differences (Brockmann  
394 and Brückner, 2001; Esslen and Kaissling, 1976). Most obviously, there are only a few  
395 olfactory receptor genes with a higher expression in drone antennae, whereas about one third  
396 of the annotated olfactory receptor genes are higher expressed in worker antennae. In  
397 addition, drone antennae showed a higher expression of genes involved in energy metabolism  
398 whereas worker antennae showed a higher expression of genes involved in neuronal  
399 communication. (2.) The daily oscillation of the two major clock (*per* and *cry2*) genes in the  
400 antennae of drones and foragers correspond to the rest-activity cycles. In foragers, the daily  
401 clock gene expression pattern changed with the training time. Drones, which performed  
402 mating flights in the afternoon, showed clock gene expression pattern similar to afternoon-  
403 trained foragers (Jain and Brockmann, 2018; Sasaki, 1990; Spangler, 1972). (3.) Gene  
404 expression comparisons with the time of the day revealed a total of 217 antennal genes  
405 regulated by circadian clock and/or onset of activity in honey bees. Out of these only 19  
406 DEGs were common among all 3 groups (drones, morning-trained foragers and afternoon-  
407 trained foragers) and remaining 198 DEGs suggested the sex and foraging-time specific  
408 regulation of daily antennal gene expression in honey bees.

409 The most prominent expression differences between drone and worker antennae are highly  
410 likely associated with the perception of the queen's mandibular gland pheromone, which  
411 functions as a sex pheromone during mating flights to attract drones (Brockmann et al., 1998;  
412 Brockmann et al., 2006). Confirming the findings by Wanner and colleagues (2007), we



413 found the same four olfactory receptor genes, *Or10*, *Or11* (binding 9-ODA, the major  
414 mandibular gland component), *Or18*, and *Or170*, and *CEst1* among the top genes showing a  
415 drone-biased expression. In addition to this group of genes, we found a very high drone-  
416 biased expression for *Shaw*, a gene encoding a potassium channel (Hodge, 2009). To the best  
417 of our knowledge there is no report regarding a possible function of *Shaw* in insect olfaction.  
418 Further, our gene set enrichment analysis showed that genes involved in oxidative  
419 phosphorylation are predominantly higher expressed in drone antennae. Drone antennae have  
420 much higher number of sensory neurons than worker antennae and coding in sensory neurons  
421 is based on generating action potentials, which are very energy expensive (Attwell and  
422 Laughlin, 2001). Similarly, a higher expression of genes involved in protein folding and  
423 protein processing might be a consequence of a higher protein turnover rate associated with a  
424 higher general activity in drone antennae.

425 As for the drone antennae, our RNA-seq analysis of the forager antennae clearly corroborated  
426 previous microarray studies showing worker-biased gene expression for: *Or63*, *Obp2*, *Obp4*,  
427 *Obp11*, *Obp16*, *Obp19*, *Obp21*, *CSP6* and *Cyp6BE1* (Forêt and Maleszka, 2006; Wanner et  
428 al., 2007). We also found worker-biased expression of several biogenic amine receptors  
429 accompanied by general higher expression of genes involved in the tyrosine/dopamine  
430 pathway. Previous studies in honey bees (McQuillan et al., 2012; Vergoz et al., 2009)  
431 demonstrated that the expression of dopamine and tyrosine receptors is age and task-  
432 dependent and can be modulated by social pheromones. In addition, our GO enrichment  
433 analysis suggested higher secondary messenger cascades, cell signaling and extracellular  
434 matrix associated genes in drone antennae.

435 The gene expression differences between drone and worker antennae strongly reflect the  
436 different physiological specialization. Drone antennae are specialized to detect small amounts  
437 of queen's pheromone and quickly respond to changes in pheromone concentration  
438 (Brockmann et al., 1998; De Bruyne and Baker, 2008). In contrast, forager antennae are  
439 predominantly involved in the detection and discrimination of complex odor mixtures which  
440 requires "pre-processing" or filtering of the sensory signal sent to the brain. Previous  
441 extracellular recordings from the olfactory poreplate sensilla indicated that there might be  
442 physiological interactions between the olfactory sensory neurons within one sensillum (Getz  
443 and Akers, 1994; Getz and Akers, 1995). Furthermore, inhibitory interactions had been  
444 suggested to sharpen and filter the neuronal signal sent to the brain (Andersson et al., 2010;

445 Couto et al., 2005). In addition, the higher expression of genes involved in neural modulation  
446 is associated with a high degree of context-dependent plasticity in sensory processing (Bigot  
447 et al., 2012; Gadenne et al., 2016; Grosmaître et al., 2001; McQuillan et al., 2012; Vergoz et  
448 al., 2009; Watanabe et al., 2014).

449 Comparison of gene expression levels in drone and forager antennae between morning and  
450 afternoon allowed us to identify olfactory related genes that show temporal changes.  
451 Previously, we demonstrated that morning and afternoon feeder time-training phase-shifts the  
452 daily oscillation of expression of two major clock genes: *per* and *cry2* in the brain and  
453 antennae of honey bee workers (Jain and Brockmann, 2018). Accordingly, *cry2* and *per*  
454 showed different expression levels in all the three groups compared (drones, morning-trained  
455 foragers, and afternoon-trained foragers). The direction of the change in expression was  
456 opposite between morning- and afternoon-trained foragers, and drones showed a similar  
457 expression change as the afternoon-trained foragers. Moreover, our qPCR study showed that  
458 the daily oscillation of *per* and *cry2* expression in the antenna are similar between drones and  
459 afternoon-trained foragers. *Per* and *cry2* expressions peaked during early morning and were  
460 the lowest during the late afternoon in both. It has been shown that the clock genes  
461 expression rhythm in antennae is necessary for rhythmic olfactory responses and sun compass  
462 navigation (Merlin et al., 2009; Tanoue et al., 2004).

463 As suggested by several earlier studies, the findings of our RNA-seq study confirm that  
464 sensory processing in insect antennae appears to be more complex than just detecting  
465 odorants and transmitting sensory signals to the brain (Getz and Akers, 1994,1995; Couto et  
466 al. 2005; Anderson et al., 2010). Given the sensory specialization of antennae and the relative  
467 low number of cell types, whole antenna gene expression analysis provide very robust results  
468 (see e.g. our results and those by Wanner et al., 2007). Thus, explorative RNA-seq analysis  
469 has the potential to identify molecular players affecting antennal sensory processing as well  
470 as to increase our knowledge of possible processing strategies that could be verified by  
471 subsequent electrophysiological studies.

472

#### 473 **ACKNOWLEDGEMENT**

474 We thank Wolfgang Roessler and Johannes Spaethe for constructive discussion regarding the  
475 project and experimental procedure during a research stay of R. Jain at the University of

476 Wuerzburg. We also thank DAAD “A New Passage to India” fellowship for the travel grant  
477 to R. Jain.

478

#### 479 **COMPETING INTERESTS**

480 The authors declare that there is no conflict of interest.

481

#### 482 **AUTHOR CONTRIBUTIONS**

483 R.J. and A.B. designed the experiments. R.J. performed the experiments and analyzed the  
484 data. R.J. and A.B. wrote the manuscript.

485

#### 486 **FUNDING**

487 R.J. was supported by Indian Council of Medical Research (ICMR) fellowship; A.B. was  
488 supported by NCBS-TIFR institutional funds No. 12P4167.

489

#### 490 **REFERENCES**

491 **Amin, H. and Lin, A. C.** (2019). Neuronal mechanisms underlying innate and learned  
492 olfactory processing in *Drosophila*. *Curr. Opin. Insect Sci.* **36**, 9–17.

493 **Andersson, M. N., Larsson, M. C., Blaženec, M., Jakuš, R., Zhang, Q. H. and Schlyter,**  
494 **F.** (2010). Peripheral modulation of pheromone response by inhibitory host compound  
495 in a beetle. *J. Exp. Biol.* **213**, 3332–3339.

496 **Arnold, G., Masson, C. and Budharugsa, S.** (1985). Comparative study of the antennal  
497 lobes and their afferent pathway in the workerbee and the drone *Apis mellifera L.* *Cell*  
498 *Tissue Res.* **242**, 593–605.

499 **Attwell, D. and Laughlin, S. B.** (2001). An energy budget for signaling in the grey matter of  
500 the brain. *J. Cereb. Blood Flow Metab.* **21**, 1133–1145.

501 **Bigot, L., Shaik, H. A., Bozzolan, F., Party, V., Lucas, P., Debernard, S. and Siauxsat, D.**  
502 (2012). Peripheral regulation by ecdysteroids of olfactory responsiveness in male  
503 Egyptian cotton leaf worms, *Spodoptera littoralis*. *Insect Biochem. Mol. Biol.* **42**, 22–31.

504 **Brockmann, A. and Brückner, D.** (2001). Structural differences in the drone olfactory  
505 system of two phylogenetically distant *Apis* species, *A. florea* and *A. mellifera*.  
506 *Naturwissenschaften* **88**, 78–81.

507 **Brockmann, A., Brückner, D. and Crewe, R. M.** (1998). The EAG Response Spectra of  
508 Workers and Drones to Queen Honeybee Mandibular Gland Components: The  
509 Evolution of a Social Signal. *Naturwissenschaften* **85**, 283–285.

510 **Brockmann, A., Dietz, D., Spaethe, J. and Tautz, J.** (2006). Beyond 9-ODA: SEX  
511 Pheromone Communication in the European Honey Bee *Apis mellifera L.* *J. Chem. Ecol.*

- 512           **32**, 657–667.
- 513   **Burger, H., Ayasse, M., Dötterl, S., Kreissl, S. and Galizia, C. G.** (2013). Perception of  
514       floral volatiles involved in host-plant finding behaviour: Comparison of a bee specialist  
515       and generalist. *J. Comp. Physiol. A* **199**, 751–761.
- 516   **Couto, A., Alenius, M. and Dickson, B. J.** (2005). Molecular, anatomical, and functional  
517       organization of the *Drosophila* olfactory system. *Curr. Biol.* **15**, 1535–1547.
- 518   **De Bruyne, M. and Baker, T. C.** (2008). Odor detection in insects: Volatile codes. *J. Chem.*  
519       *Ecol.* **34**, 882–897.
- 520   **Dobin, A., Davis, C. A., Schlesinger, F., Drenkow, J., Zaleski, C., Jha, S., Batut, P.,**  
521       **Chaisson, M. and Gingeras, T. R.** (2013). STAR: Ultrafast universal RNA-seq aligner.  
522       *Bioinformatics* **29**, 15–21.
- 523   **Esslen, J. and Kaissling, K. E.** (1976). Zahl und Verteilung antennaler Sensillen bei der  
524       Honigbiene (*Apis mellifera* L.). *Zoomorphologi* **83**, 227–251.
- 525   **Flanagan, D. and Mercer, A. R.** (1989). An atlas and 3-D reconstruction of the antennal  
526       lobes in the worker honey bee, *Apis mellifera* L (Hymenoptera: Apidae). *Int. J. Insect*  
527       *Morphol. Embryol.* **18**, 145–159.
- 528   **Forêt, S. and Maleszka, R.** (2006). Function and evolution of a gene family encoding  
529       odorant binding-like proteins in a social insect, the honey bee (*Apis mellifera*). *Genome*  
530       *Res.* **16**, 1404–1413.
- 531   **Frisch, K. V.** (1967). *Dance language and orientation of bees*. Cambridge, MA: Harvard  
532       University Press.
- 533   **Frisch, B. and Aschoff, J.** (1987). Circadian rhythms in honeybees: entrainment by feeding  
534       cycles. *Physiol. Entomol.* **12**, 41–49.
- 535   **Gadenne, C., Barrozo, R. B. and Anton, S.** (2016). Plasticity in Insect Olfaction: To Smell  
536       or Not to Smell? *Annu. Rev. Entomol.* **61**, 317–333.
- 537   **Galizia, C. G., McIlwraith, S. L. and Menzel, R.** (1999). A digital three-dimensional atlas  
538       of the honeybee antennal lobe based on optical sections acquired by confocal  
539       microscopy. *Cell Tissue Res.* **295**, 383–394.
- 540   **Gary, N. E.** (1962). Chemical Mating Attractants in the Queen Honey Bee. *Science.* **136**,  
541       773–774.
- 542   **Getz, W. M. and Akers, R. P.** (1994). Honeybee olfactory sensilla behave as integrated  
543       processing units. *Behav. Neural Biol.* **61**, 191–195.
- 544   **Getz, W. M. and Akers, R. P.** (1995). Partitioning non-linearities in the response of honey  
545       bee olfactory receptor neurons to binary odors. *BioSystems* **34**, 27–40.
- 546   **Grabe, V. and Sachse, S.** (2018). Fundamental principles of the olfactory code. *BioSystems*  
547       **164**, 94–101.

- 548 **Grosmaître, X., Marion-Poll, F. and Renou, M.** (2001). Biogenic amines modulate  
549 olfactory receptor neurons firing activity in *Mamestra brassicae*. *Chem. Senses* **26**, 653–  
550 661.
- 551 **Hodge, J. J. L.** (2009). Ion channels to inactivate neurons in *Drosophila*. *Front. Mol.*  
552 *Neurosci.* **2**, 1–10.
- 553 **Hughes, M. E., Hogenesch, J. B. and Kornacker, K.** (2010). JTK\_CYCLE: An efficient  
554 nonparametric algorithm for detecting rhythmic components in genome-scale data sets.  
555 *J. Biol. Rhythms* **25**, 372–380.
- 556 **Jain, R. and Brockmann, A.** (2018). Time-restricted foraging under natural light/dark  
557 condition shifts the molecular clock in the honey bee, *Apis mellifera*. *Chronobiol. Int.*  
558 **35**, 1723–1734.
- 559 **Kanehisa, M. and Goto, S.** (2000). KEGG: Kyoto Encyclopedia of Genes and Genomes.  
560 *Nucleic Acids Res.* **28**, 27–30.
- 561 **Koeniger, N., Koeniger, G., Gries, M. and Tingek, S.** (2005). Drone competition at drone  
562 congregation areas in four *Apis* species. *Apidologie* **36**, 211–221.
- 563 **Kropf, J., Kelber, C., Bieringer, K. and Rössler, W.** (2014). Olfactory subsystems in the  
564 honeybee: sensory supply and sex specificity. *Cell Tissue Res.* **357**, 583–595.
- 565 **Liao, Y., Smyth, G. K. and Shi, W.** (2014). FeatureCounts: An efficient general purpose  
566 program for assigning sequence reads to genomic features. *Bioinformatics* **30**, 923–930.
- 567 **Love, M. I., Huber, W. and Anders, S.** (2014). Moderated estimation of fold change and  
568 dispersion for RNA-seq data with DESeq2. *Genome Biol.* **15**, 550.
- 569 **Luo, W. and Brouwer, C.** (2013). Pathview: An R/Bioconductor package for pathway-based  
570 data integration and visualization. *Bioinformatics* **29**, 1830–1831.
- 571 **Luo, W., Friedman, M. S., Shedden, K., Hankenson, K. D. and Woolf, P. J.** (2009).  
572 GAGE: Generally applicable gene set enrichment for pathway analysis. *BMC*  
573 *Bioinformatics* **10**, 1–17.
- 574 **McQuillan, H. J., Barron, A. B. and Mercer, A. R.** (2012). Age- and behaviour-related  
575 changes in the expression of biogenic amine receptor genes in the antennae of honey  
576 bees (*Apis mellifera*). *J. Comp. Physiol. A Neuroethol. Sensory, Neural, Behav. Physiol.*  
577 **198**, 753–761.
- 578 **Merlin, C., Gegear, R. J. and Reppert, S. M.** (2009). Antennal Circadian Clocks  
579 Coordinate Sun Compass Orientation in Migratory Monarch Butterflies. *Science.* **325**,  
580 1700–1704.
- 581 **Mondet, F., Alaux, C., Severac, D., Rohmer, M., Mercer, A. R. and Le Conte, Y.** (2015).  
582 Antennae hold a key to Varroa-sensitive hygiene behaviour in honey bees. *Sci. Rep.* **5**,  
583 10454.
- 584 **Mutak, A.** (2017). cosinor2: Extended tools for cosinor analysis of rhythms.

- 585 **Naeger, N. L. and Robinson, G. E.** (2016). Transcriptomic analysis of instinctive and  
586 learned reward-related behaviors in honey bees. *J. Exp. Biol.* **219**, 3554–3561.
- 587 **Nagari, M., Szyszka, P., Galizia, G. and Bloch, G.** (2017). Task-related phasing of  
588 circadian rhythms in antennal responsiveness to odorants and pheromones in honeybees.  
589 *J. Biol. Rhythms* **32**, 593–608.
- 590 **Patton, D. F., Katsuyama, A. M., Pavlovski, I., Michalik, M., Patterson, Z., Parfyonov,**  
591 **M., Smit, A. N., Marchant, E. G., Chung, J., Abizaid, A., et al.** (2014). Circadian  
592 mechanisms of food anticipatory rhythms in rats fed once or twice daily: Clock gene and  
593 endocrine correlates. *PLoS One* **9**, 1–25.
- 594 **R Core Team** (2017). R: a language and environment for statistical computing.
- 595 **Raudvere, U., Kolberg, L., Kuzmin, I., Arak, T., Adler, P., Peterson, H. and Vilo, J.**  
596 (2019). g:Profiler: a web server for functional enrichment analysis and conversions of  
597 gene lists (2019 update). *Nucleic Acids Res.* **47**, W191–W198.
- 598 **Renou, M.** (2014). Pheromones and general odor perception in insects. In *Neurobiology of*  
599 *Chemical Communication* (ed. Mucignat-Caretta, C.), pp. 23–55. Boca Raton (FL): CRC  
600 Press/Taylor & Francis.
- 601 **Ruttner, F.** (1985). Reproductive behaviour in honeybees. In *Experimental behavioral*  
602 *ecology and sociobiology (Fortschritte der Zoologie)* (ed. Hölldobler, B.) and Lindauer,  
603 M.), pp. 225–236. Stuttgart: Gustav Fischer Verlag.
- 604 **Sandoz, J. C.** (2006). Odour-evoked responses to queen pheromone components and to plant  
605 odours using optical imaging in the antennal lobe of the honey bee drone *Apis mellifera*  
606 *L. J. Exp. Biol.* **209**, 3587–98.
- 607 **Sasaki, M.** (1990). Photoperiodic regulation of honeybee mating-flight time: exploitation of  
608 innately phase-fixed circadian oscillation. *Adv. Invertebr. Reprod.* **5**, 503–508.
- 609 **Spangler, H. G.** (1972). Daily Activity Rhythms of Individual Worker and Drone Honey  
610 Bees. *Ann. Entomol. Soc. Am.* **65**, 1073–1076.
- 611 **Sun, Y., Liu, L., Ben-Shahar, Y., Jacobs, J. S., Eberl, D. F. and Welsh, M. J.** (2009).  
612 TRPA channels distinguish gravity sensing from hearing in Johnston’s organ. *Proc.*  
613 *Natl. Acad. Sci.* **106**, 13606–13611.
- 614 **Tanoue, S., Krishnan, P., Krishnan, B., Dryer, S. E. and Hardin, P. E.** (2004). Circadian  
615 Clocks in Antennal Neurons Are Necessary and Sufficient for Olfaction Rhythms in  
616 *Drosophila*. *Curr. Biol.* **14**, 638–649.
- 617 **Vergoz, V., Mcquillan, H. J., Geddes, L. H., Pullar, K., Nicholson, B. J., Paulin, M. G.**  
618 **and Mercer, A. R.** (2009). Peripheral modulation of worker bee responses to queen  
619 mandibular pheromone. *Proc. Natl. Acad. Sci.* **106**, 20930–20935.
- 620 **Wallberg, A., Bunikis, I., Pettersson, O. V., Mosbech, M. B., Childers, A. K., Evans, J.**  
621 **D., Mikheyev, A. S., Robertson, H. M., Robinson, G. E. and Webster, M. T.** (2019).  
622 A hybrid de novo genome assembly of the honeybee, *Apis mellifera*, with chromosome-  
623 length scaffolds. *BMC Genomics* **20**, 1–19.

624 **Wanner, K. W., Nichols, A. S., Walden, K. K. O., Brockmann, A., Luetje, C. W. and**  
625 **Robertson, H. M.** (2007). A honey bee odorant receptor for the queen substance 9-oxo-  
626 2-decenoic acid. *Proc. Natl. Acad. Sci.* **104**, 14383–14388.

627 **Watanabe, H., Shimohigashi, M. and Yokohari, F.** (2014). Serotonin-immunoreactive  
628 sensory neurons in the antenna of the cockroach *Periplaneta americana*. *J. Comp.*  
629 *Neurol.* **522**, 414–434.

630
